# Supplementary material
Source: publisher figshare collection journal article supplement (https://tandf.figshare.com/articles/dataset/_/3840720)

## Supplementary Information

### Allometric models for height and aboveground biomass of dominant tree species in South African Mistbelt forests

Sylvanus Mensah, Ruan Veldtman and Thomas Seifert

Southern Forests 2016, 79(1): 19–30. <http://dx.doi.org/10.2989/20702620.2016.1225187>

**Supplementary Figure S1:** Predicted vs observed values of height (m) for each species

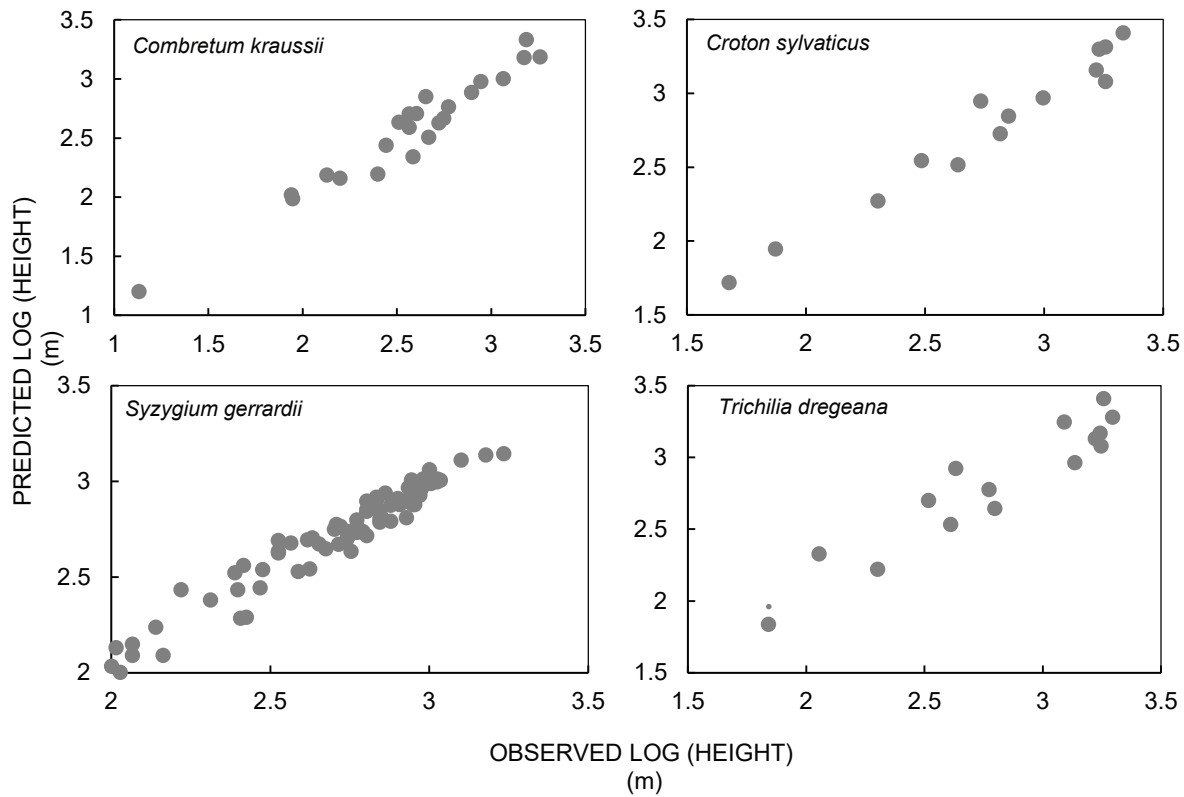

**Supplementary Figure S2:** Predicted vs observed values of branch biomass (kg dry mass) for each species

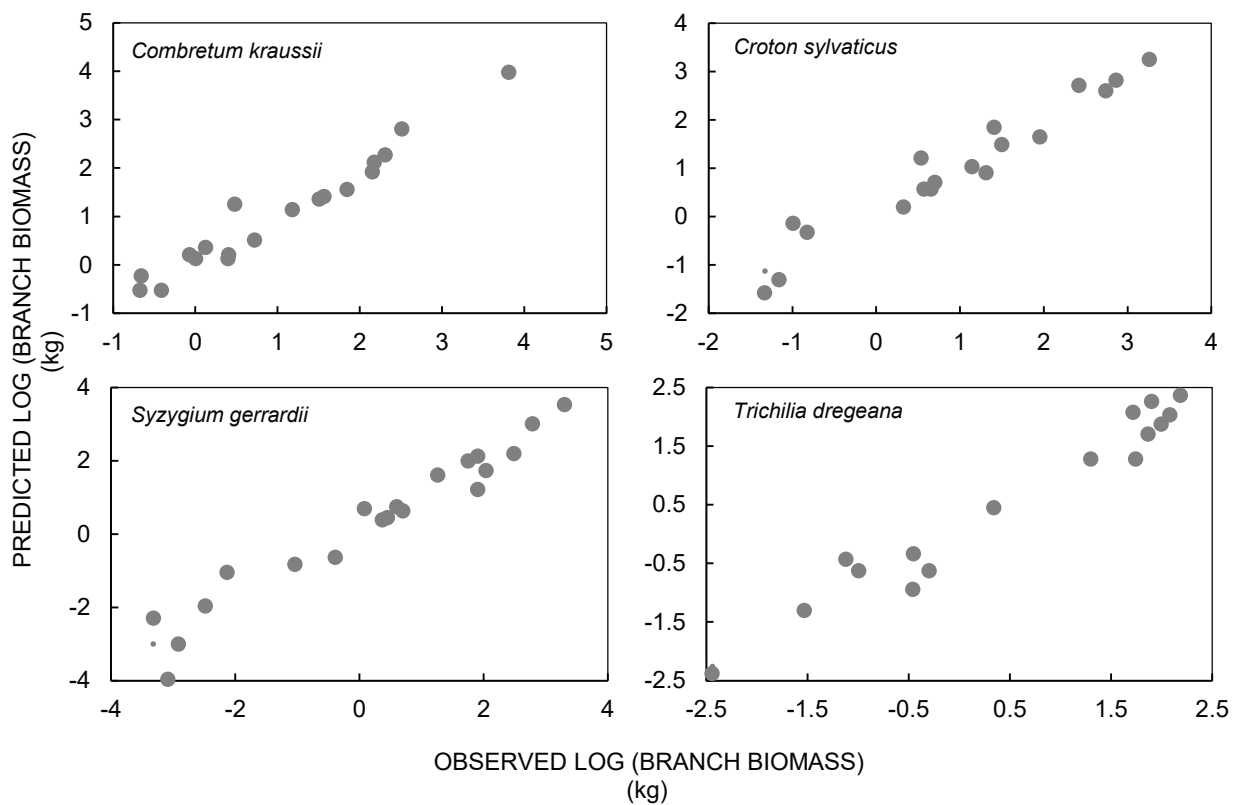

**Supplementary Figure S3:** Predicted vs observed values of aboveground biomass (kg dry mass) for each species

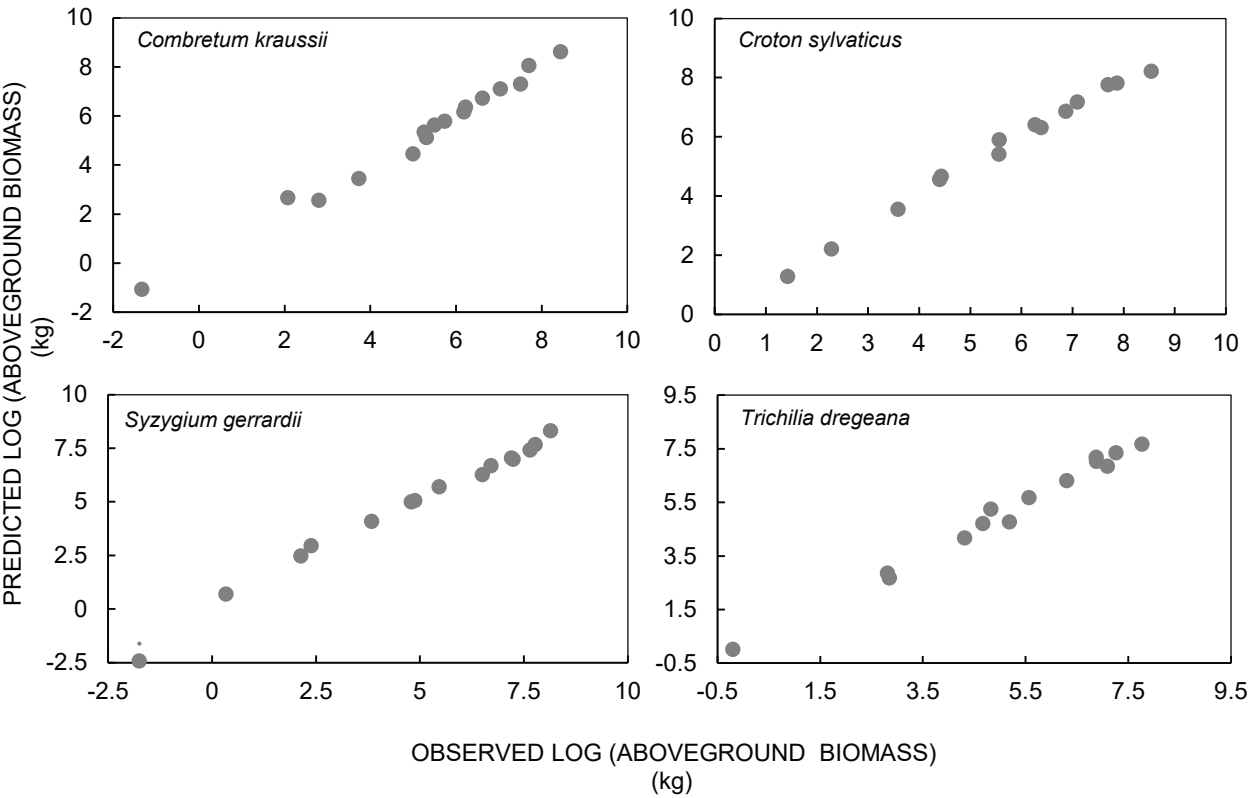

Supplement: Supplementary file 1 [file 2]
